# Supplementary material for: Anisotropic and Highly Sensitive Flexible Strain Sensors Based on Carbon Nanotubes and Iron Nanowires for Human–Computer Interaction Systems
Source: MDPI journal article supplement (doi:10.3390/ijms241713029), 2023-08-22
Supplement: s1 [file s1]

Supplementary Materials: Video S1, Video S2, Video S3.

Figure S1, Figure S2, Figure S2

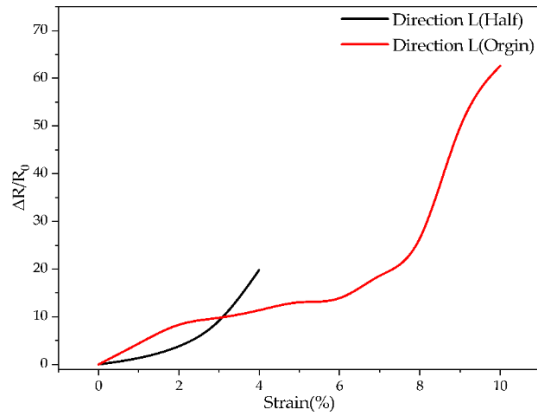

Figure S1. Strain testing of sprayed half-sensitive materials

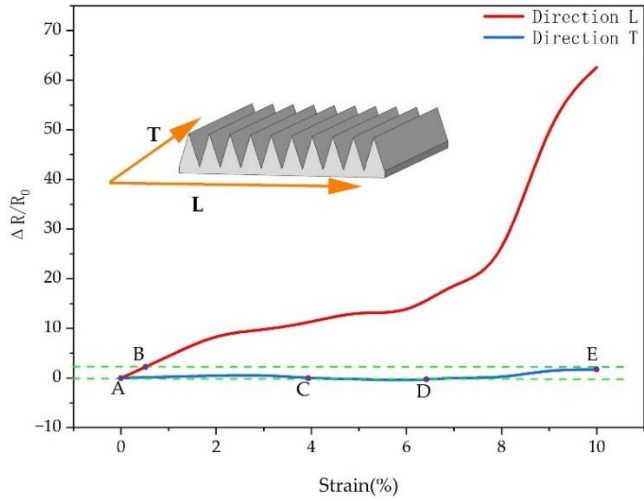

Figure S2. Change in  $\Delta R/R_0$  value for directions T and L 10% strain

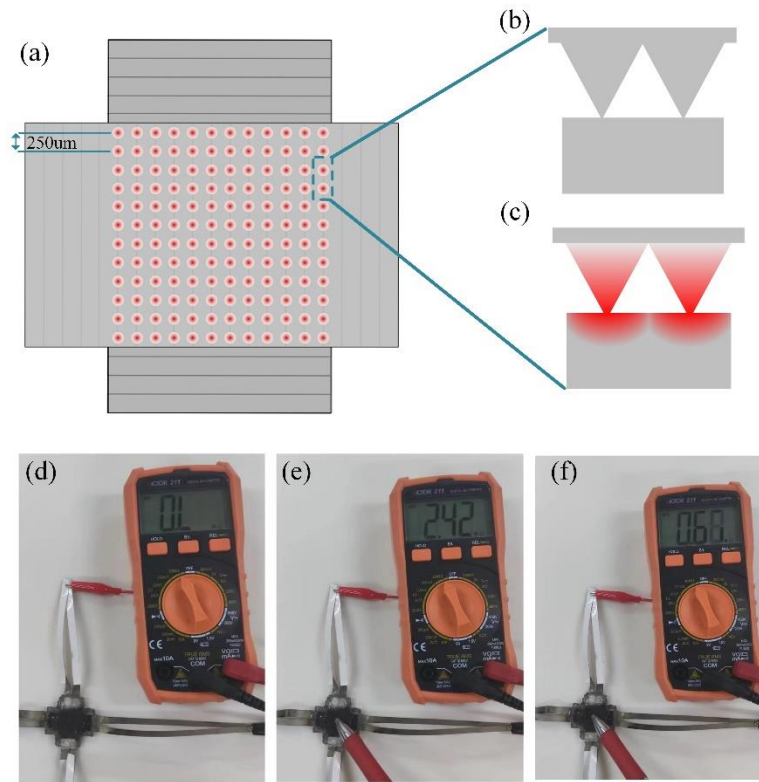

**Figure S3.** (a) Sensor pressure pixel detection schematic. (b)(c) Schematic diagram of the principle of action of pressure detection(d)(e)(f) Change in resistance value as sensor pressure increases
