# Supplementary material for: Anisotropic and Highly Sensitive Flexible Strain Sensors Based on Carbon Nanotubes and Iron Nanowires for Human–Computer Interaction Systems
Source: Int J Mol Sci. 2023 Aug 22;24(17):13029. doi: 10.3390/ijms241713029 (PMC10488179; doi:10.3390/ijms241713029)
Supplement: Supplementary file 1 [file ijms-24-13029-s001.zip]

Archive with 4 entries (4 files):
- supplementary.pdf
- VideoS1.mp4
- VideoS2.mp4
- VideoS3.mp4
